# Supplementary material for: A BIM Based Framework for Damage Segmentation, Storage, and Visualization
Source: Preprints.org preprint supplement (doi:10.20944/preprints202201.0094.v1), 2022-01-06

As-damaged BIM model

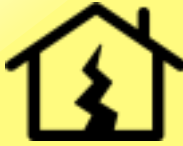

Visual Inspection

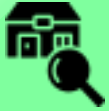

Durability Analysis

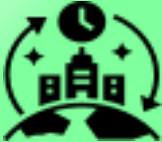

Structural Analysis

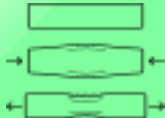

Material Analysis

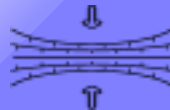

Demolition

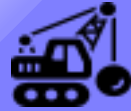

Maintenance

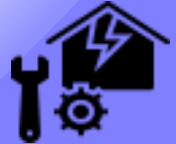

Supplement: Supplementary file 1 [file supplementary]
