# Supplementary material for: A BIM Based Framework for Damage Segmentation, Storage, and Visualization
Source: Preprints.org preprint supplement (doi:10.20944/preprints202201.0094.v1), 2022-01-06
Supplement: Supplementary file 6 [file supplementary]

Camera(s) Calibration

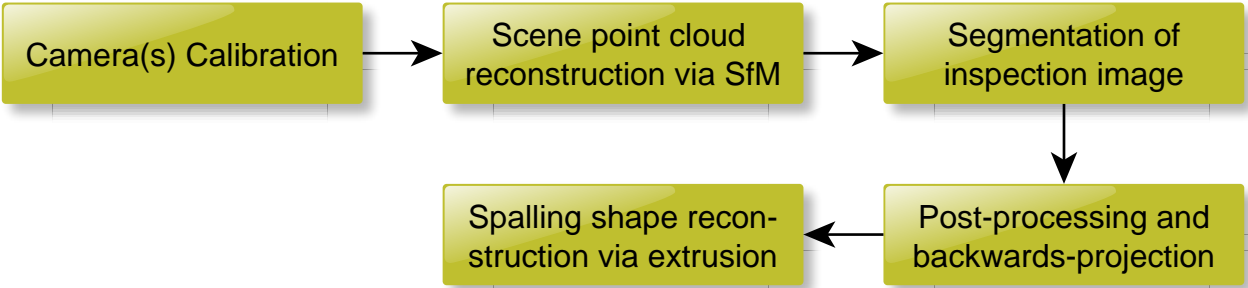

```
graph LR; A[Camera(s) Calibration] --> B[Scene point cloud reconstruction via SfM]; B --> C[Segmentation of inspection image]; C --> D[Post-processing and backwards-projection]; D --> E[Spalling shape reconstruction via extrusion];
```

The diagram is a flowchart with five yellow rectangular boxes with rounded corners and a slight gradient. The boxes are arranged in two rows. The top row contains three boxes: 'Camera(s) Calibration', 'Scene point cloud reconstruction via SfM', and 'Segmentation of inspection image'. The bottom row contains two boxes: 'Post-processing and backwards-projection' and 'Spalling shape reconstruction via extrusion'. Arrows indicate the flow: a horizontal arrow from the first box to the second, a horizontal arrow from the second box to the third, a vertical arrow from the third box down to the fourth, and a horizontal arrow from the fourth box to the fifth.

Scene point cloud  
reconstruction via SfM

Segmentation of  
inspection image

Spalling shape recon-  
struction via extrusion

Post-processing and  
backwards-projection
