# Supplementary material for: A BIM Based Framework for Damage Segmentation, Storage, and Visualization
Source: Preprints.org preprint supplement (doi:10.20944/preprints202201.0094.v1), 2022-01-06
Supplement: Supplementary file 12 [file supplementary]

Archive with 17 entries (17 files):
- alignment.pdf
- as-damaged-bim.pdf
- as-damaged-concept.pdf
- Blockdiagram-geometry-generatrion.pdf
- Bridge_Overview.pdf
- damaged-pcd.pdf
- Life-Cycle.pdf
- meshed_spalling_patch_extrusion.png
- Point cloud.png
- Process_Map_v4.pdf
- screenshot-cut-plane.pdf
- screenshot-cut-view.pdf
- Screenshot_xBIM_spalling.pdf
- spalling_geometry_generation.pdf
- spalling_segmentation_usecase.png
- UML_Model_Overview_both_variants.pdf
- Use-case-pcd-registration.pdf
