# Supplementary material for: A BIM Based Framework for Damage Segmentation, Storage, and Visualization
Source: Preprints.org preprint supplement (doi:10.20944/preprints202201.0094.v1), 2022-01-06
Supplement: Supplementary file 12 [file supplementary › Process_Map_v4.pdf]

## Damage Data

### Visual Damage Data

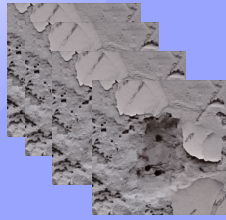

### Geometric Damage Data

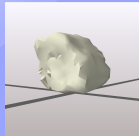

### Semantic Damage Data

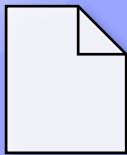

## Data processing

Damage detection

Geometry generation

Damage Alignment

Manual Editing

## BIM data

BIM as-planned  
Model

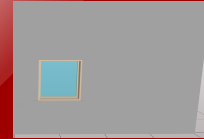

BIM with geomtric  
damage data

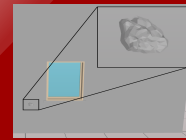

as-damaged BIM

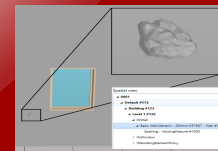

## Use cases

Planning

Analysis

Assessment
