# Supplementary figures and images for: A BIM Based Framework for Damage Segmentation, Storage, and Visualization
Source: Preprints.org preprint supplement (doi:10.20944/preprints202201.0094.v1), 2022-01-06

Bridge BIM model

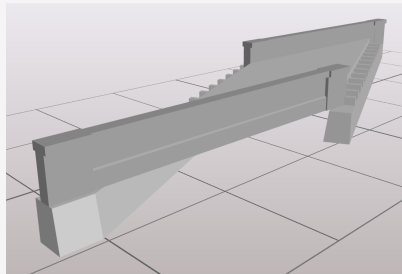

Defect geometry

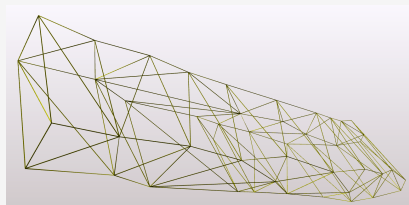

As-damaged BIM

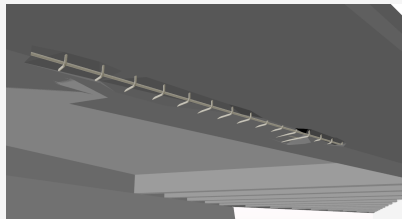

Alignment

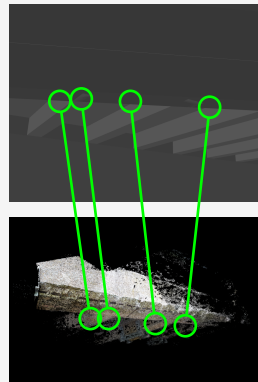

Supplement: Supplementary file 2 [file supplementary]

Bridge BIM model

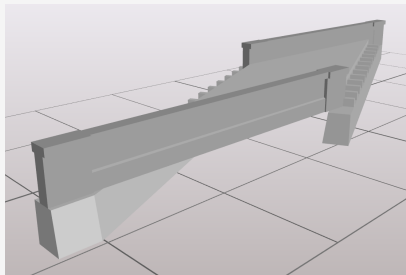

Point cloud

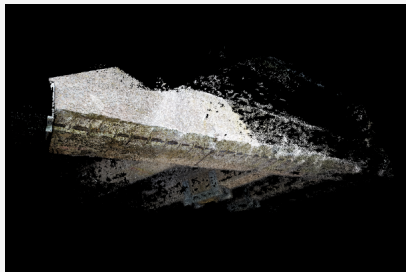

Alignment

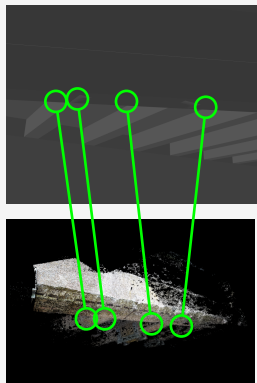

Supplement: Supplementary file 3 [file supplementary]

Point cloud with defect

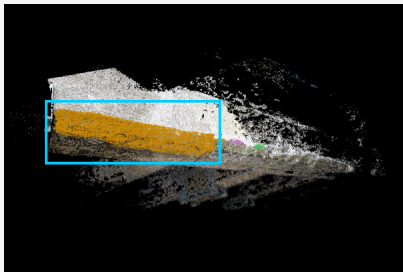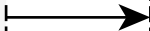

Defect geometry

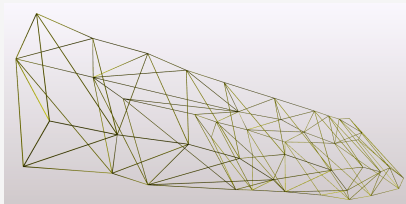

Supplement: Supplementary file 4 [file supplementary]

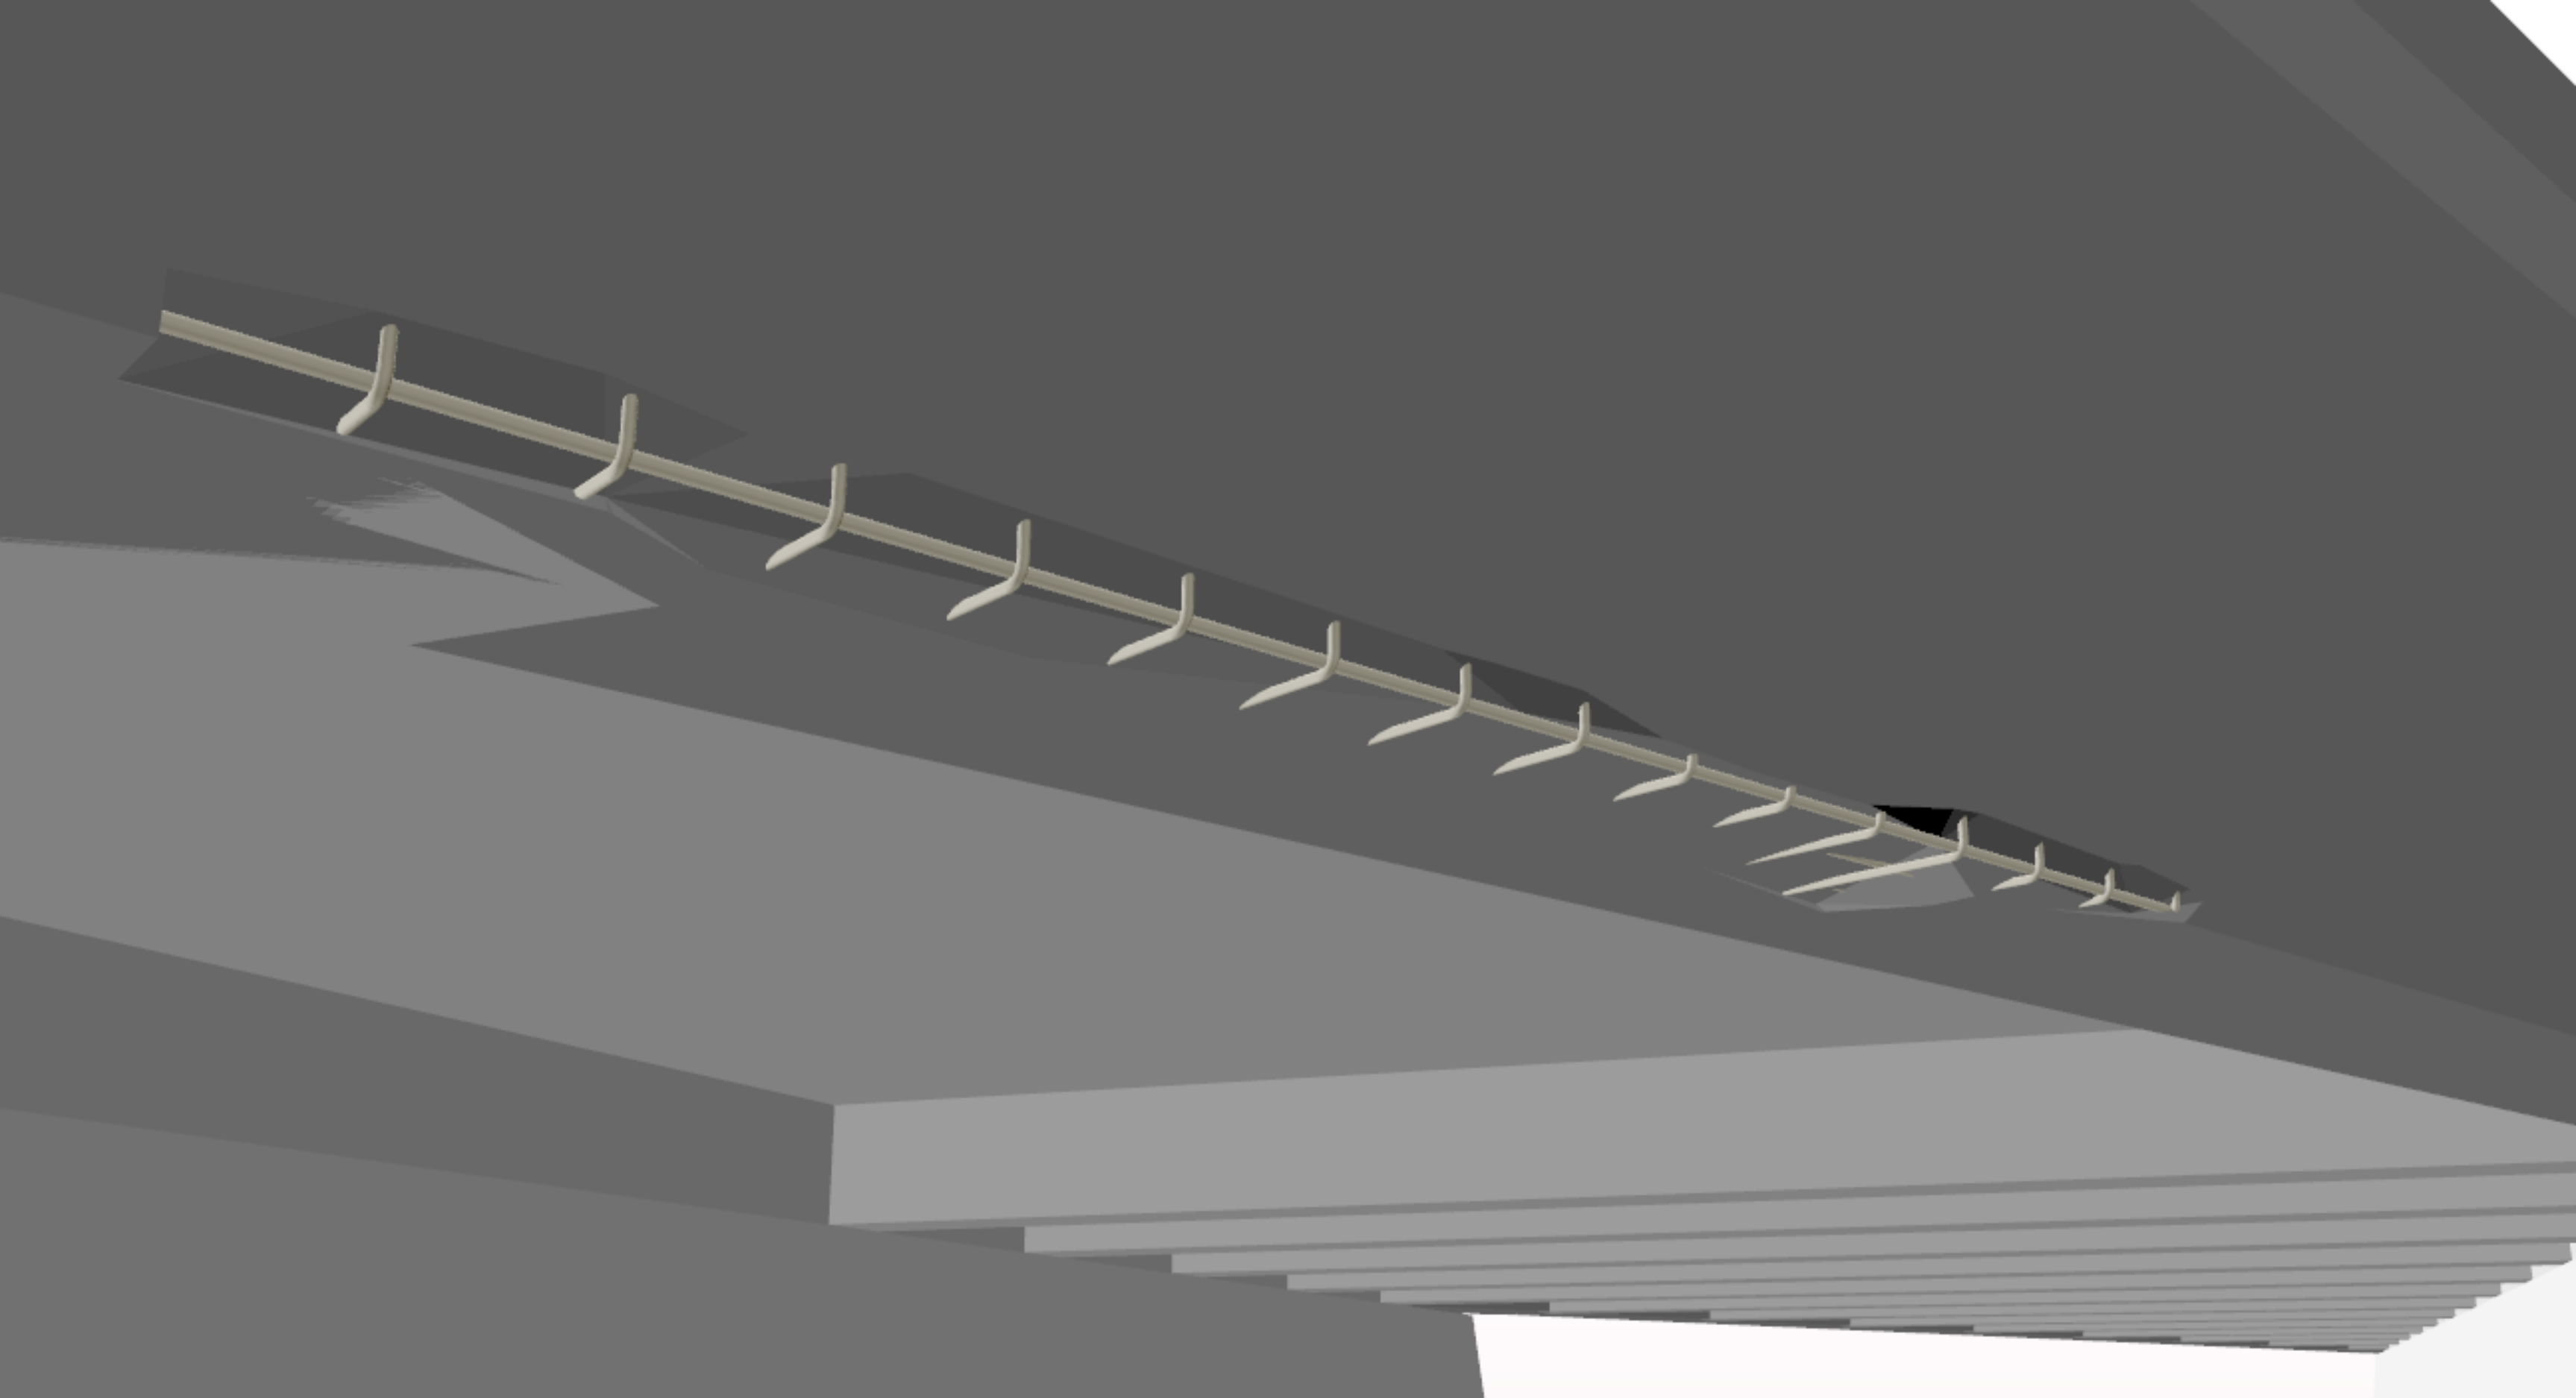

Supplement: Supplementary file 5 [file supplementary]

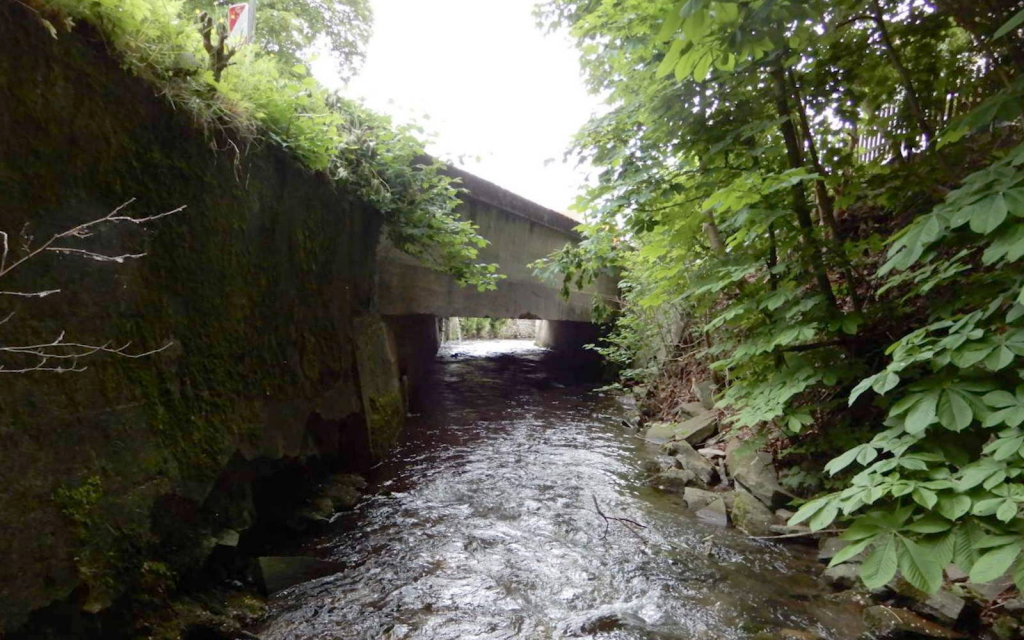

Supplement: Supplementary file 7 [file supplementary]

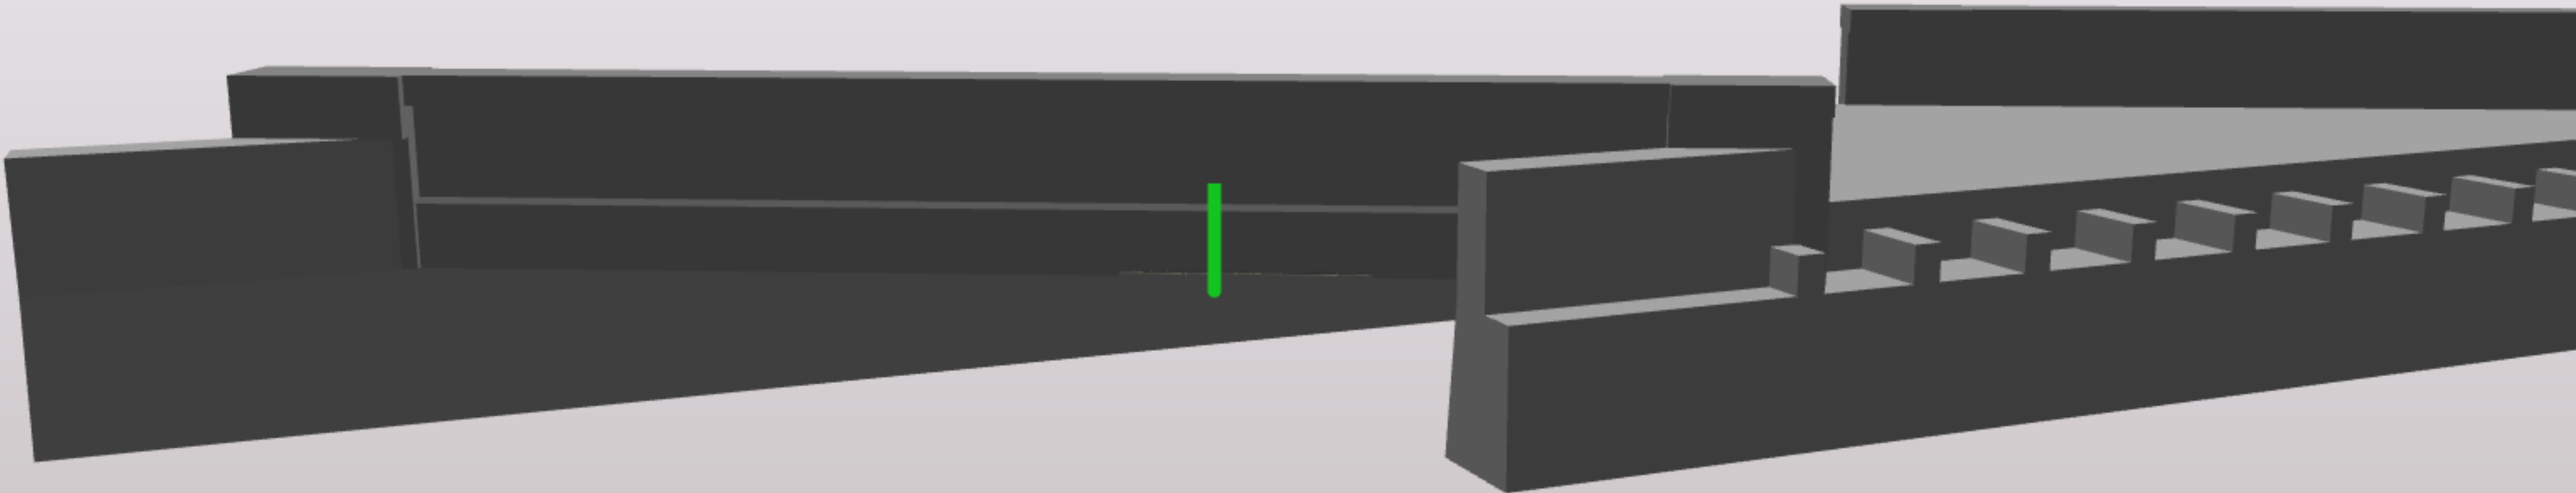

Supplement: Supplementary file 8 [file supplementary]

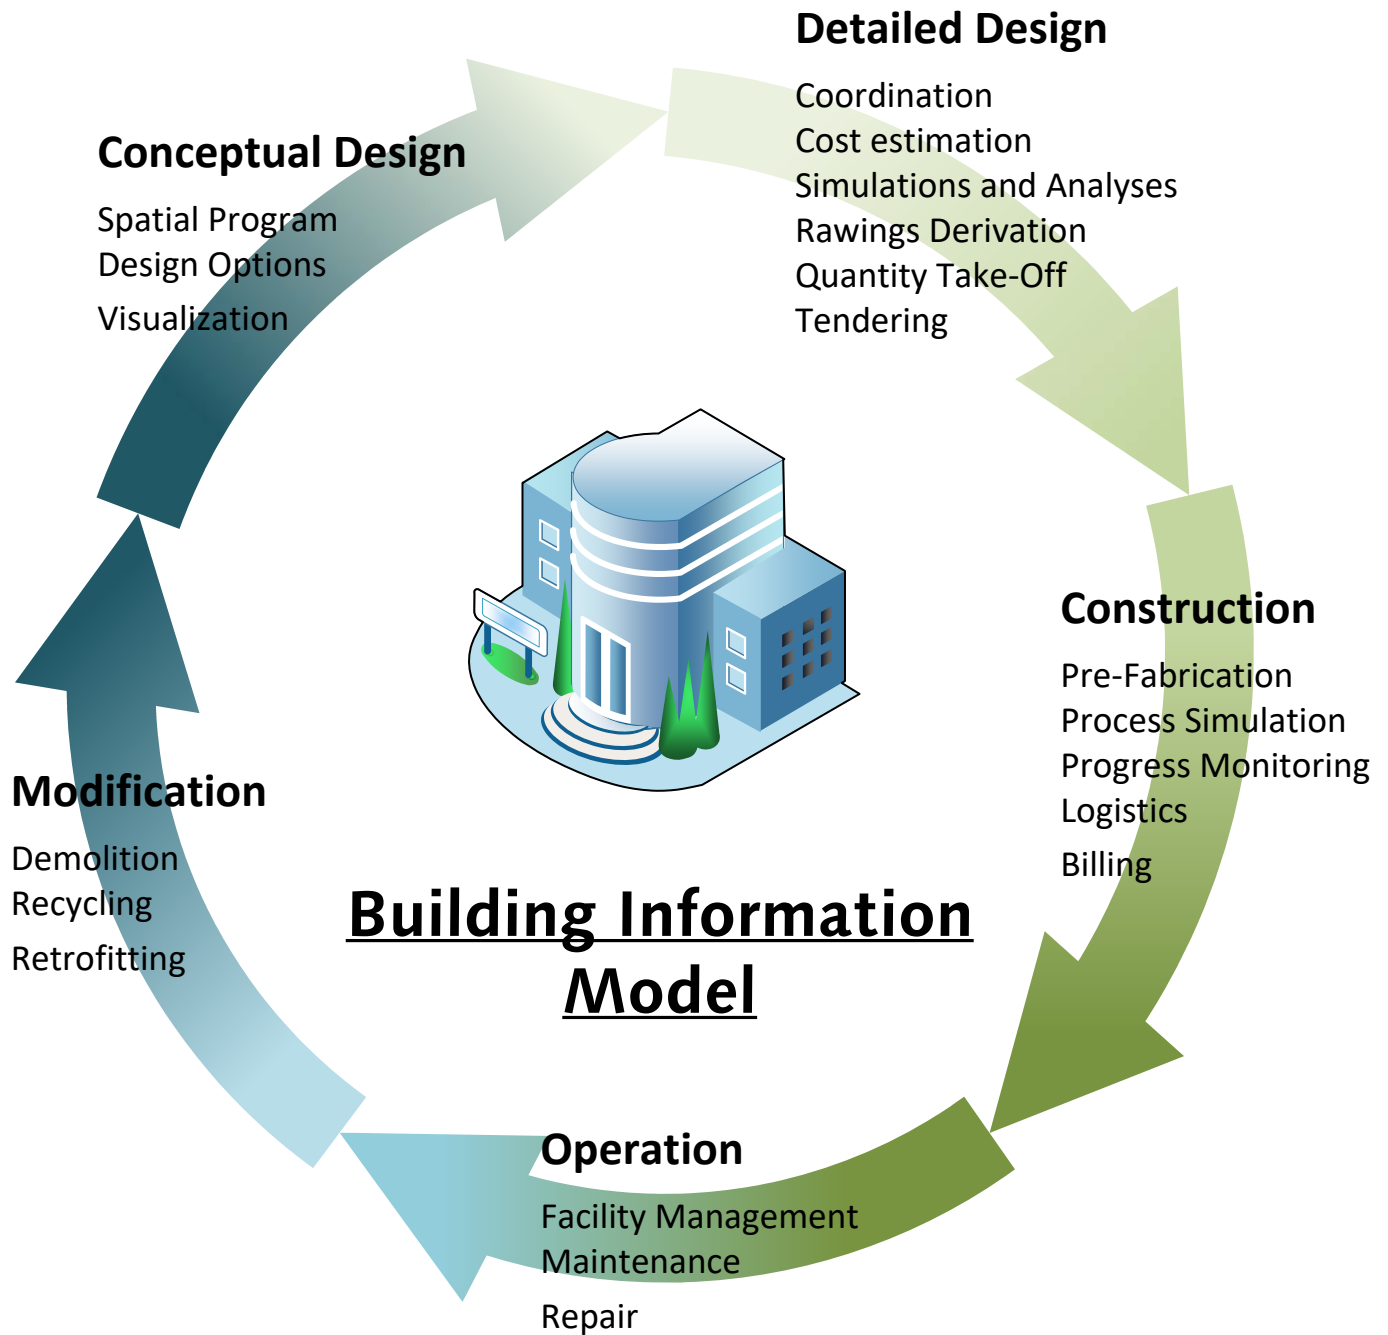

Supplement: Supplementary file 9 [file supplementary]

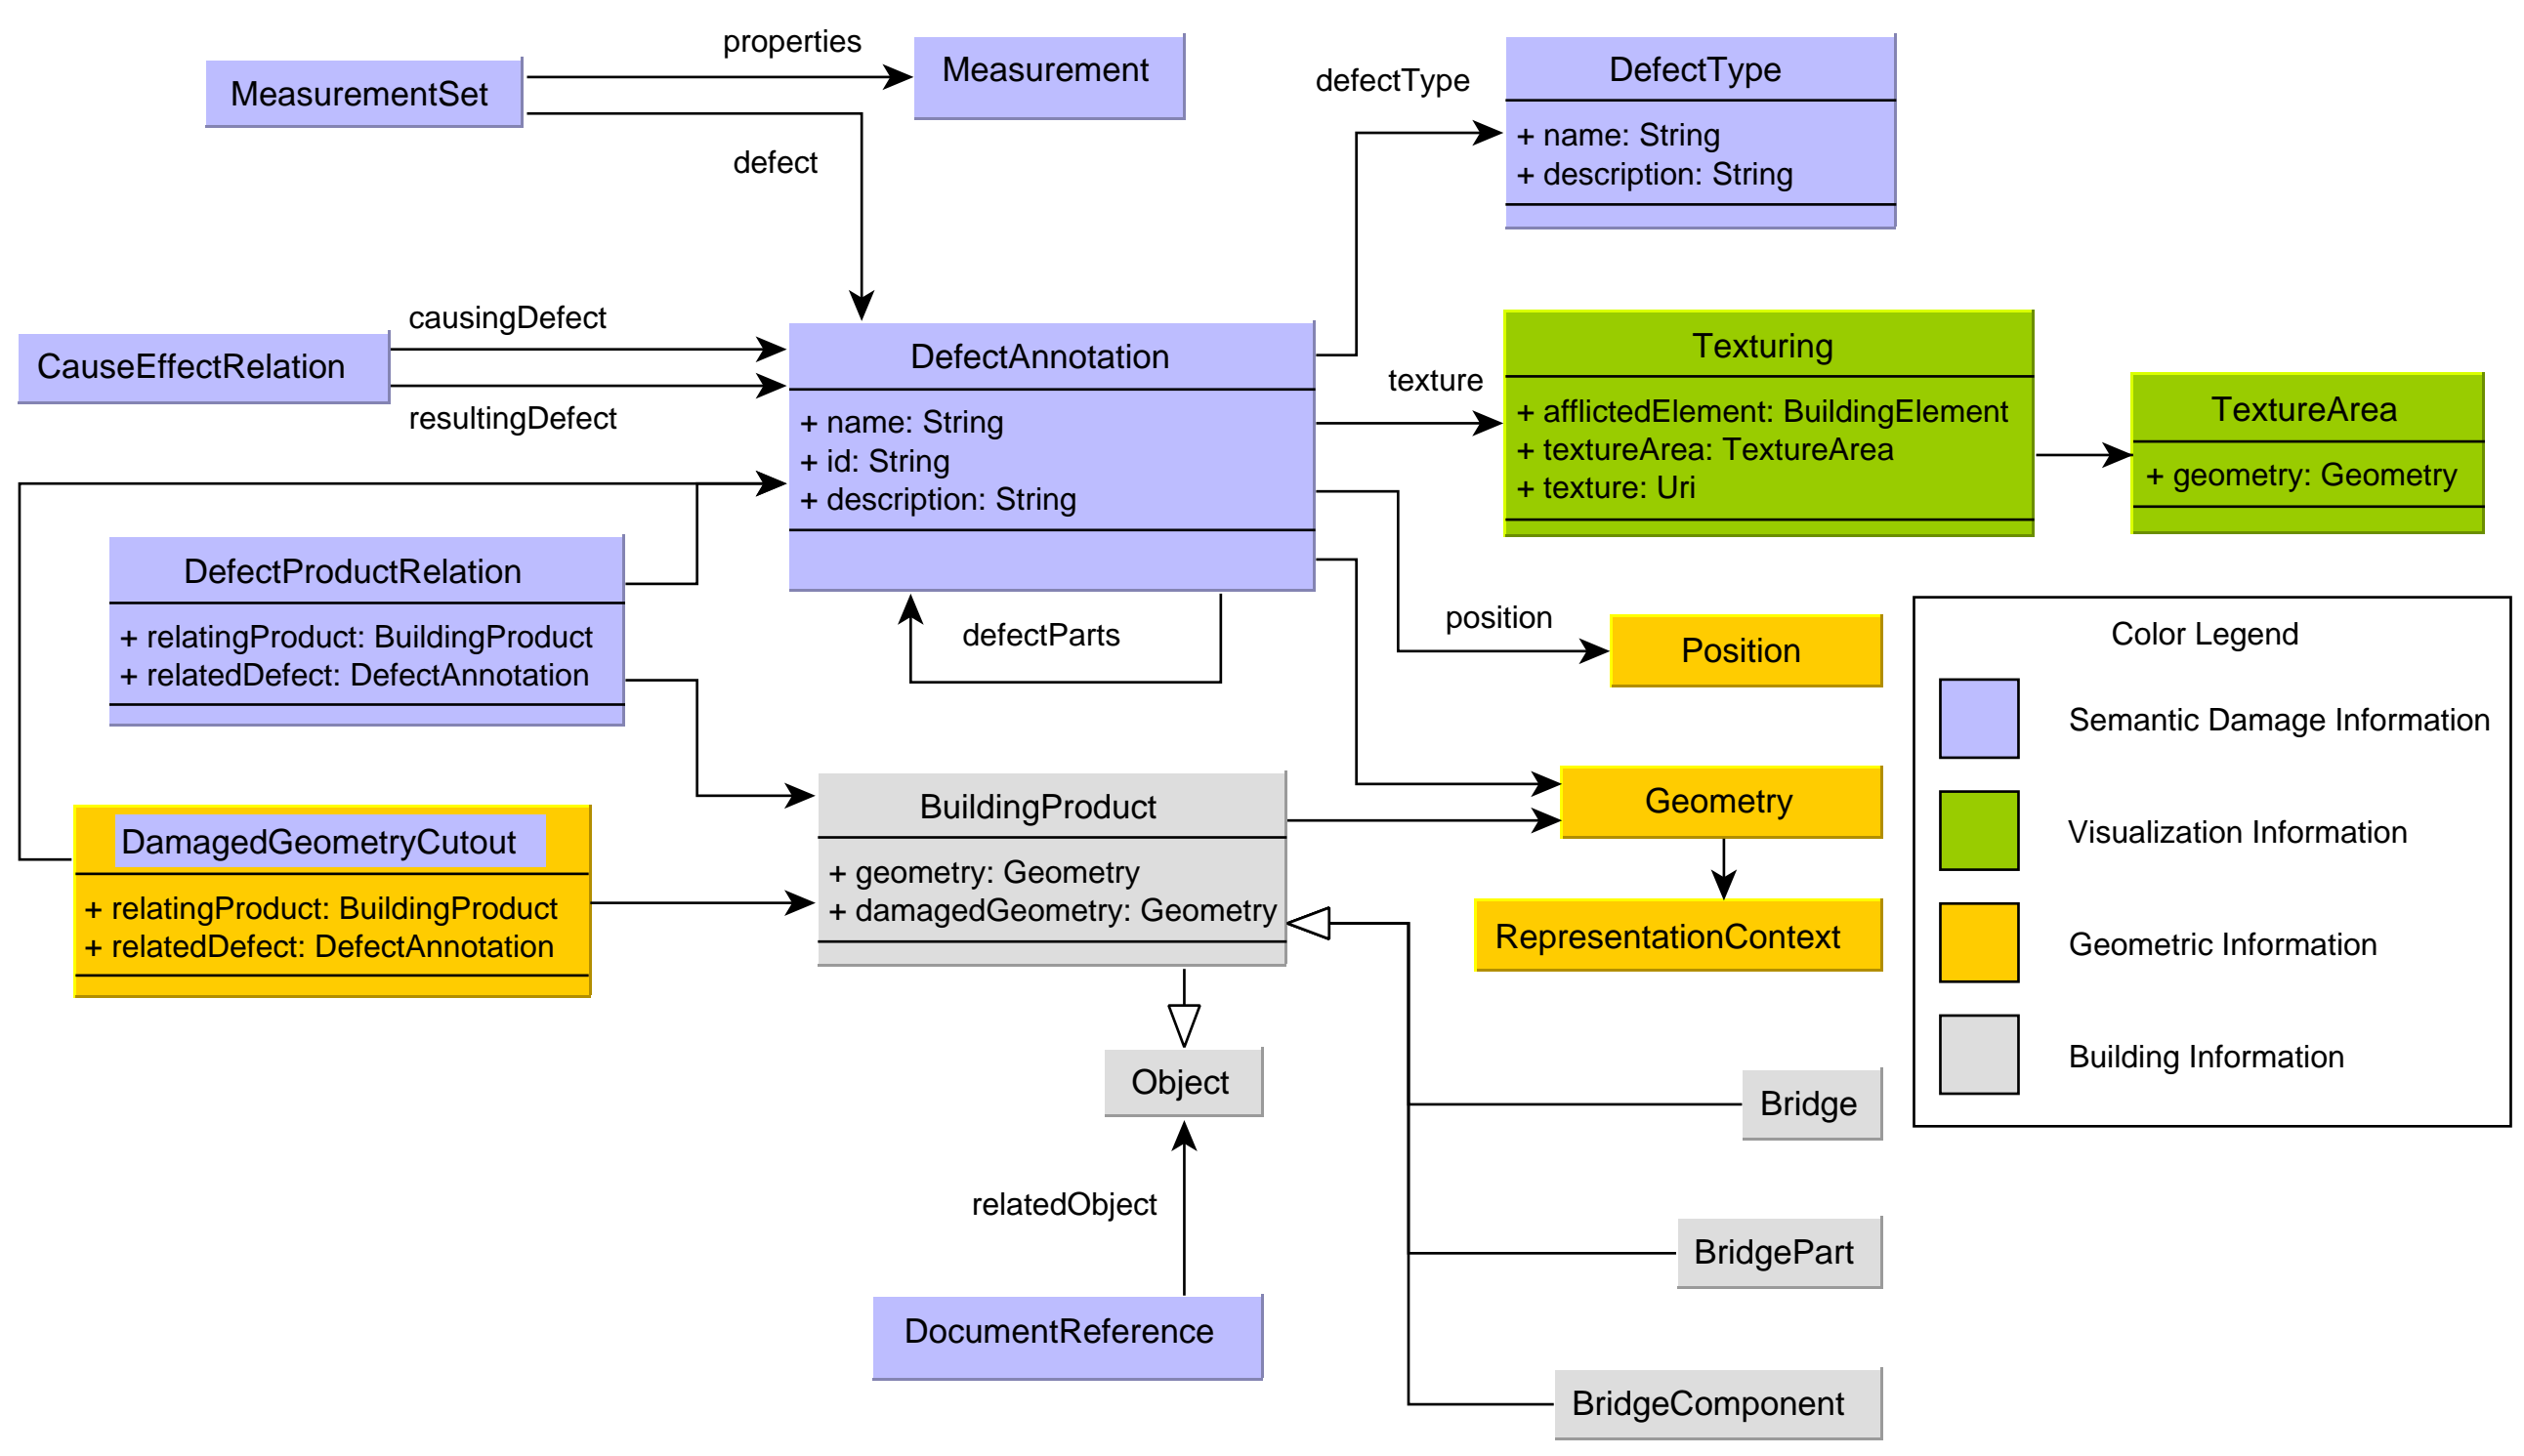

Supplement: Supplementary file 10 [file supplementary]

Segmented defect

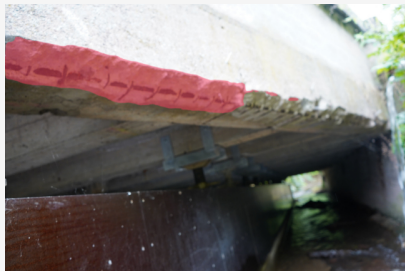

Point cloud with defect

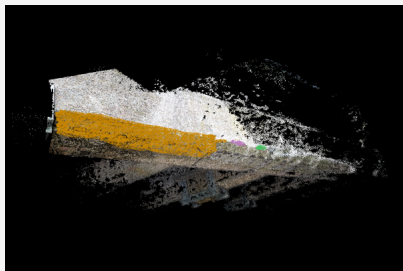

Point cloud

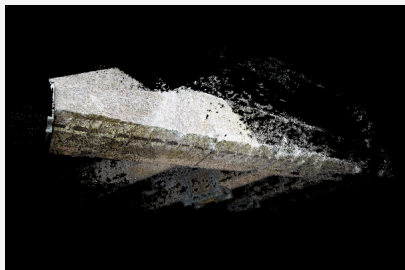

Supplement: Supplementary file 11 [file supplementary]

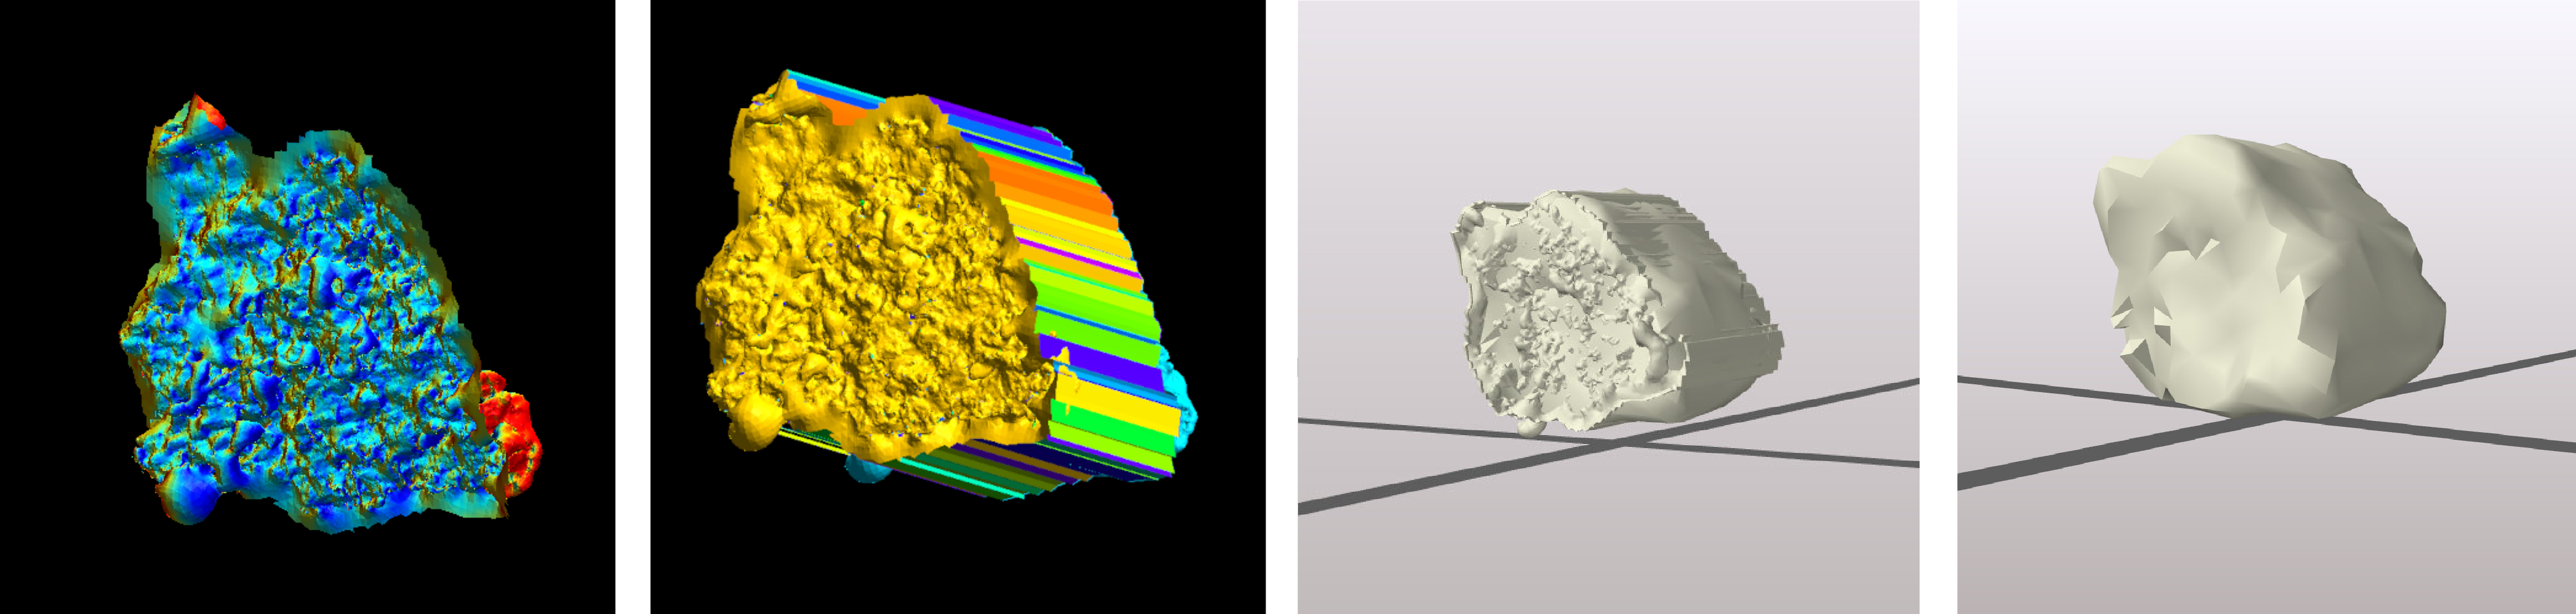

Supplement: Supplementary file 12 [file supplementary › meshed_spalling_patch_extrusion.png]

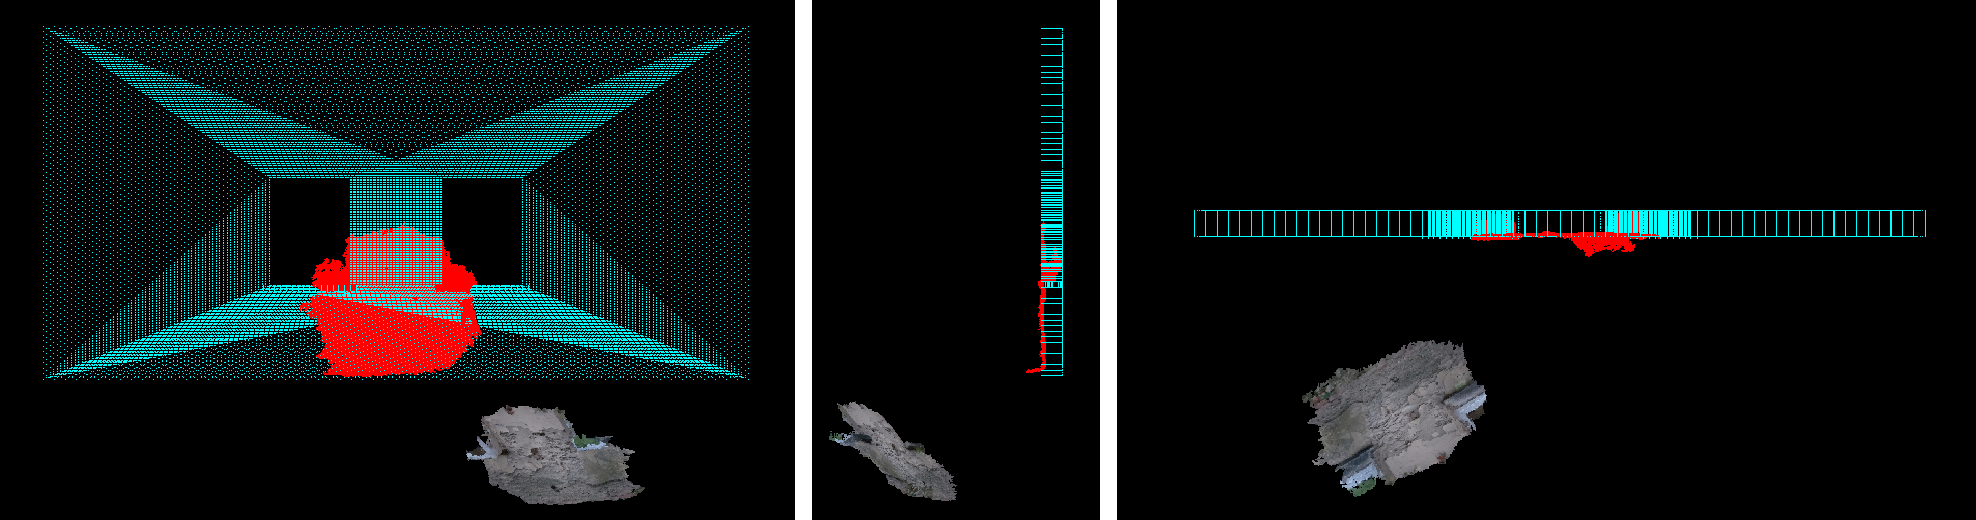

Supplement: Supplementary file 12 [file supplementary › Point cloud.png]

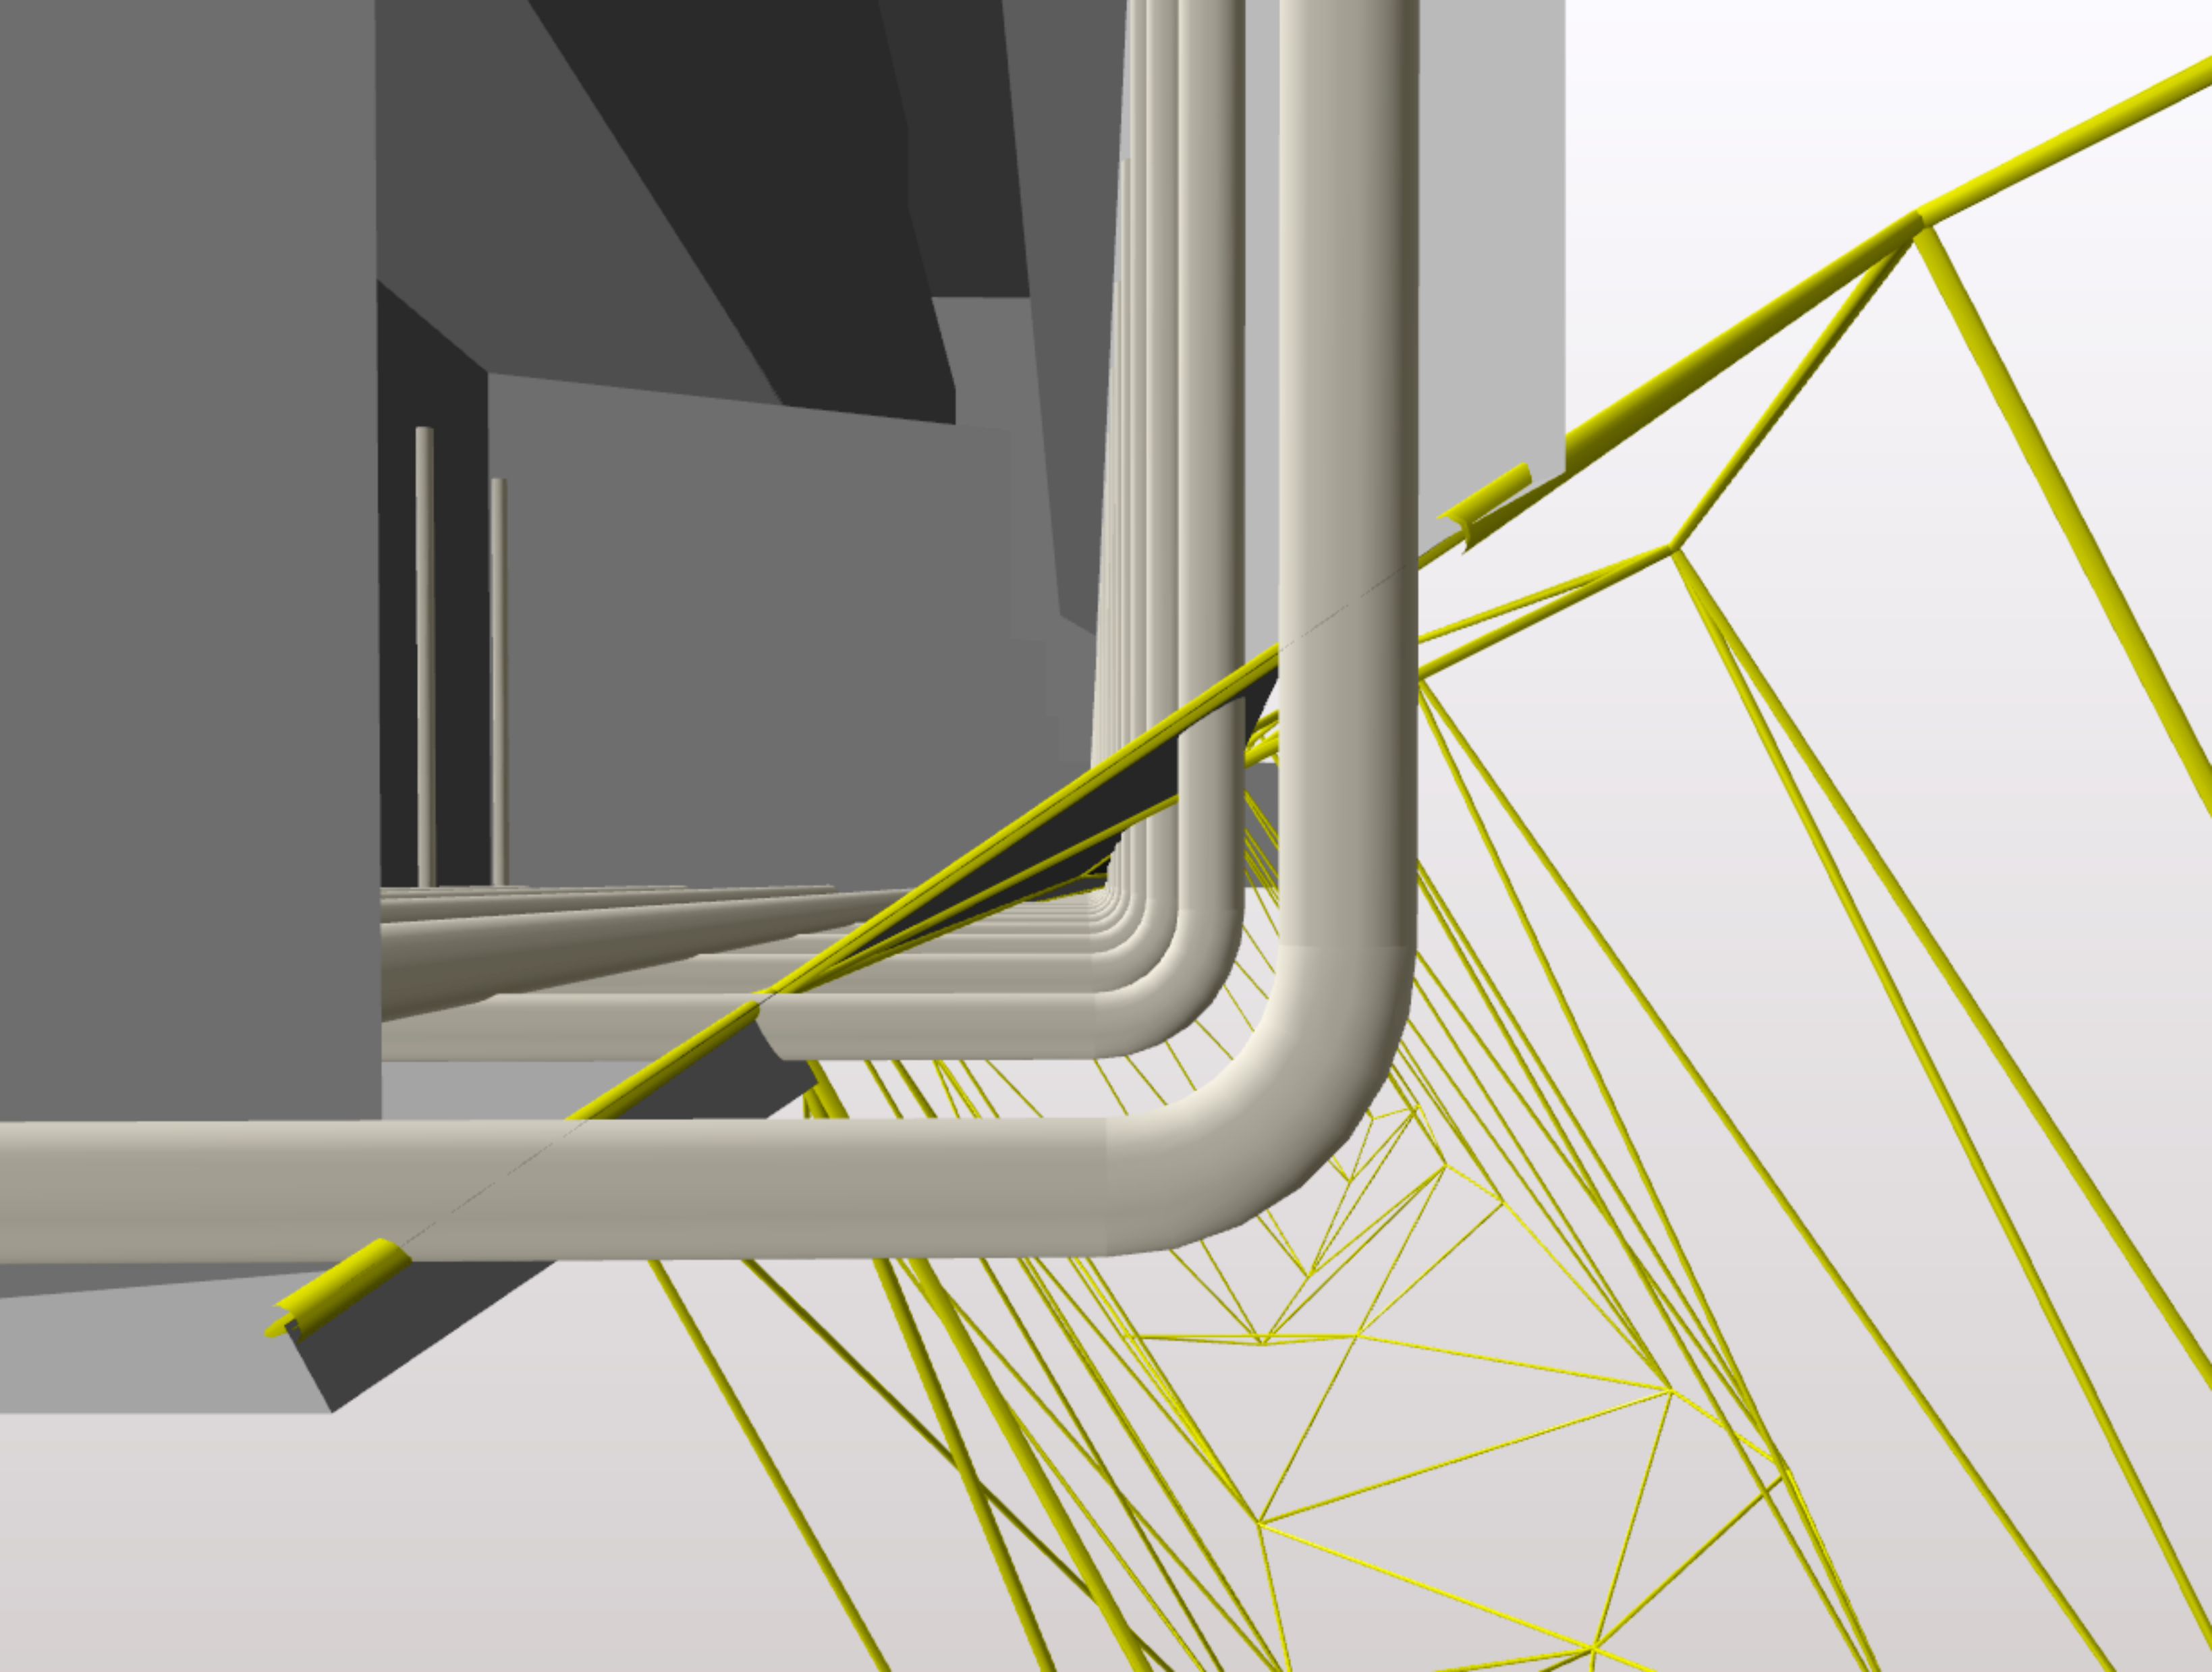

Supplement: Supplementary file 12 [file supplementary › screenshot-cut-view.pdf]

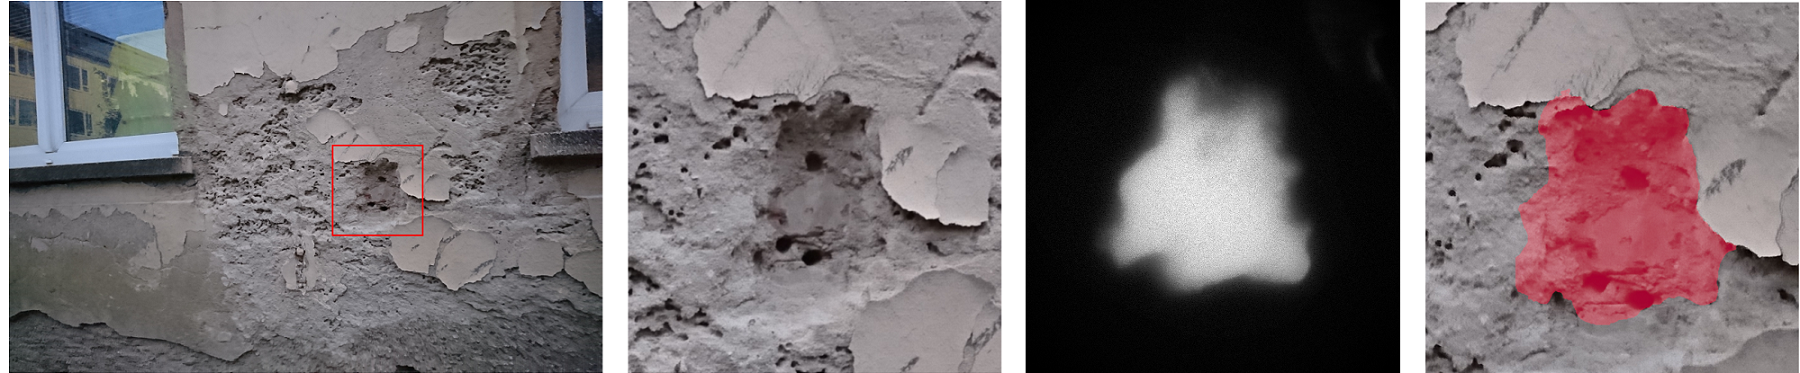

Supplement: Supplementary file 12 [file supplementary › spalling_segmentation_usecase.png]

Input images

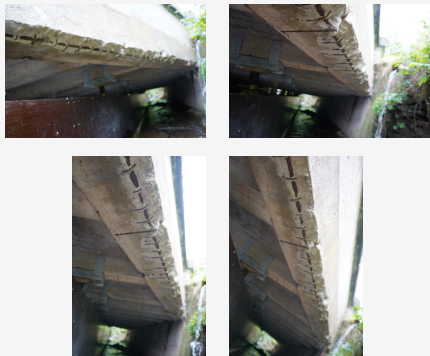

Segmented defect

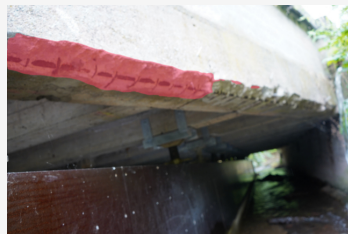

Point cloud

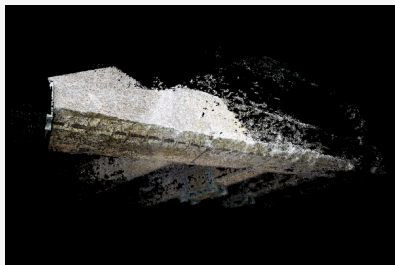

Supplement: Supplementary file 12 [file supplementary › Use-case-pcd-registration.pdf]
